# Supplementary material for: In situ coating of a lithiophilic interphase on a biporous Cu scaffold with vertical microchannels for dendrite-free Li metal batteries
Source: Royal Society of Chemistry journal article supplement (doi:10.1039/d1ta03037j), 2021-01-01
Supplement: d1ta03037j1.pdf [file d1ta03037j1.pdf]

# Supplementary Information

## **In-situ coating of lithiophilic interphase on a biporous Cu scaffold with vertical microchannels for dendrite-free Li metal batteries**

Li-Min Wang, Xiao-Kuan Ban, Zong-Zi Jin, Ran-Ran Peng, Chu-Sheng Chen\* and Chun-Hua Chen\*

*CAS Key Laboratory of Materials for Energy Conversions, Department of Materials Science and Engineering,, University of Science and Technology of China, Hefei 230026, Anhui, China*

E-mail: [cchchen@ustc.edu.cn](mailto:cchchen@ustc.edu.cn); [ccsm@ustc.edu.cn](mailto:ccsm@ustc.edu.cn)

### Thermal oxidation process:

Actually, the thermal oxidation of Cu mainly includes the following two steps:  $2\text{Cu} + 1/2\text{O}_2 \rightarrow \text{Cu}_2\text{O}$ ;  $\text{Cu}_2\text{O} + 1/2\text{O}_2 \rightarrow 2\text{CuO}$ . It has been reported that Cu is first oxidized to  $\text{Cu}_2\text{O}$ , only when the temperature is above 260 °C,  $\text{Cu}_2\text{O}$  will further react with oxygen to form  $\text{CuO}$ .<sup>1</sup> As shown in **Fig. S1**, only a small amount of  $\text{Cu}_2\text{O}$  and no  $\text{CuO}$  is formed at 250 °C. At 300 °C and higher temperatures,  $\text{CuO}$  is formed and increases with the temperature, while  $\text{Cu}_2\text{O}$  still occupies a large proportion.  $\text{CuO}$  can be produced directly only at higher temperatures, however, the scaffold becomes fragile at 400 °C and higher temperatures, and producing too much  $\text{CuO}_x$  will consume Li excessively. Therefore, we set the oxidation temperature at 300 °C.

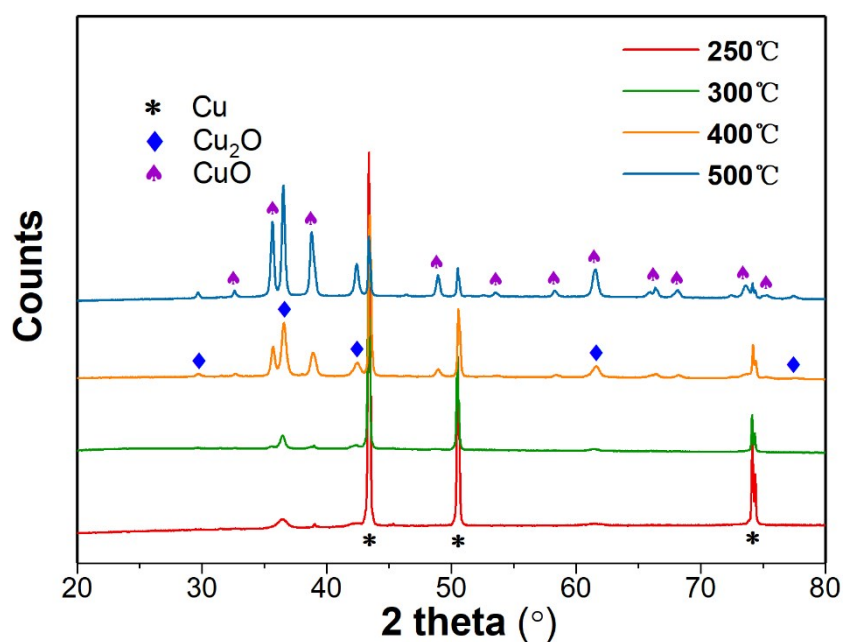

**Fig. S1.** The XRD patterns of the scaffold after oxidation at 250, 300, 400 and 500 °C for 2 h, respectively.

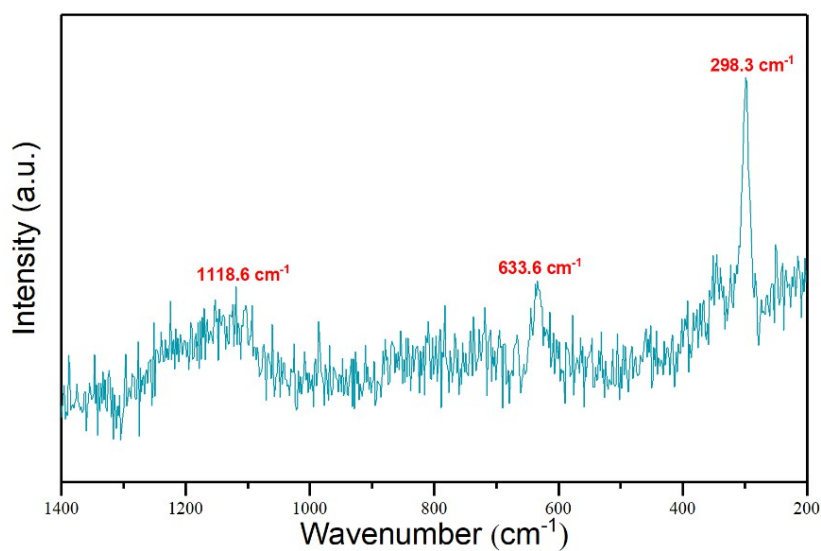

**Fig. S2.** The Raman spectrum of CuO<sub>x</sub>@Cu.

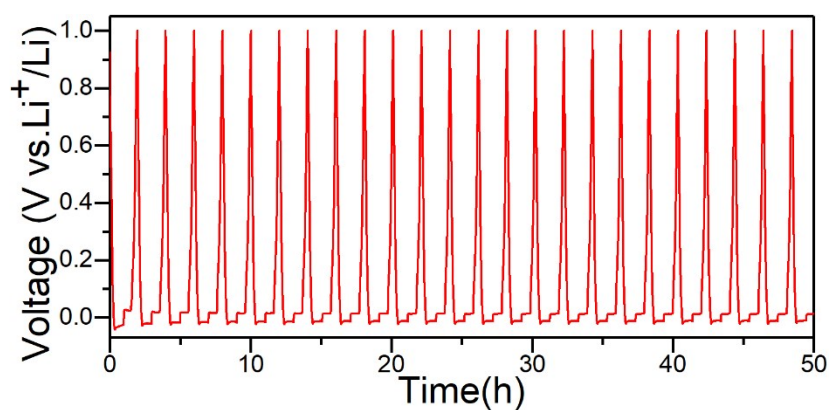

**Fig. S3.** The voltage-time profiles of CuO<sub>x</sub>@Cu half cell in the 1<sup>st</sup>-25<sup>th</sup> cycles at 1 mA cm<sup>-2</sup>.

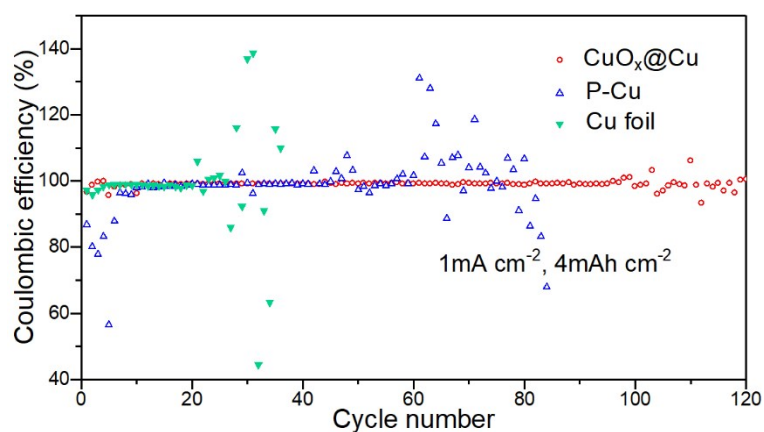

**Fig. S4.** The Coulombic efficiency comparison of CuO<sub>x</sub>@Cu, P-Cu and Cu foil under the condition of 4 mAh cm<sup>-2</sup> and 1 mA cm<sup>-2</sup>.

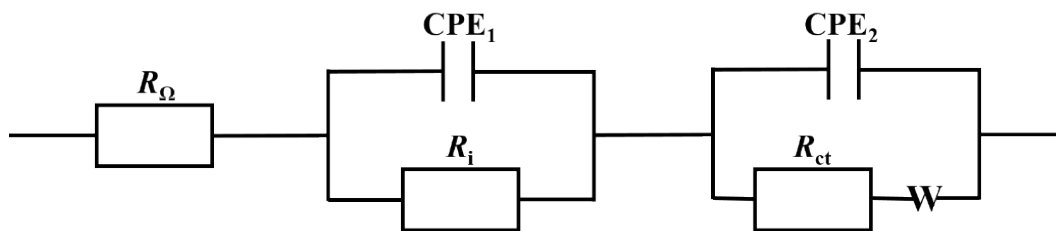

**Fig. S5.** The equivalent circuit diagram for **Fig. 6d** and **e**.

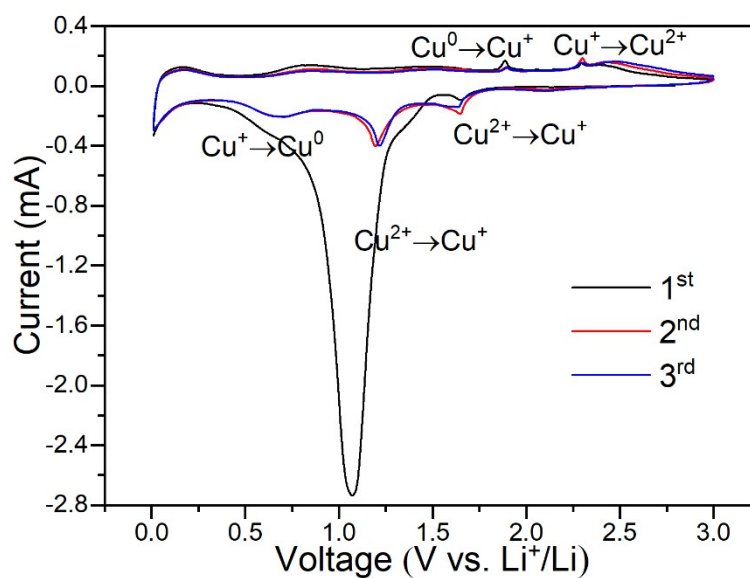

**Fig. S6.** The CV curves of Li//CuO<sub>x</sub>@Cu cell between 0.01-3 V at a scan rate of 0.1 mV s<sup>-1</sup>.

### The details of the molten Li infusion process:

In an argon-filled glove box, a stainless steel plate was placed on the heating table, and heat up to 350 °C to melt Li. Then a piece of  $\text{CuO}_x@\text{Cu}$  scaffold contacted the molten Li and took in it quickly, and the molten Li could fully filled the inner space within a few seconds. Subsequently, the composite electrode cooled down and was stored in the glove box.

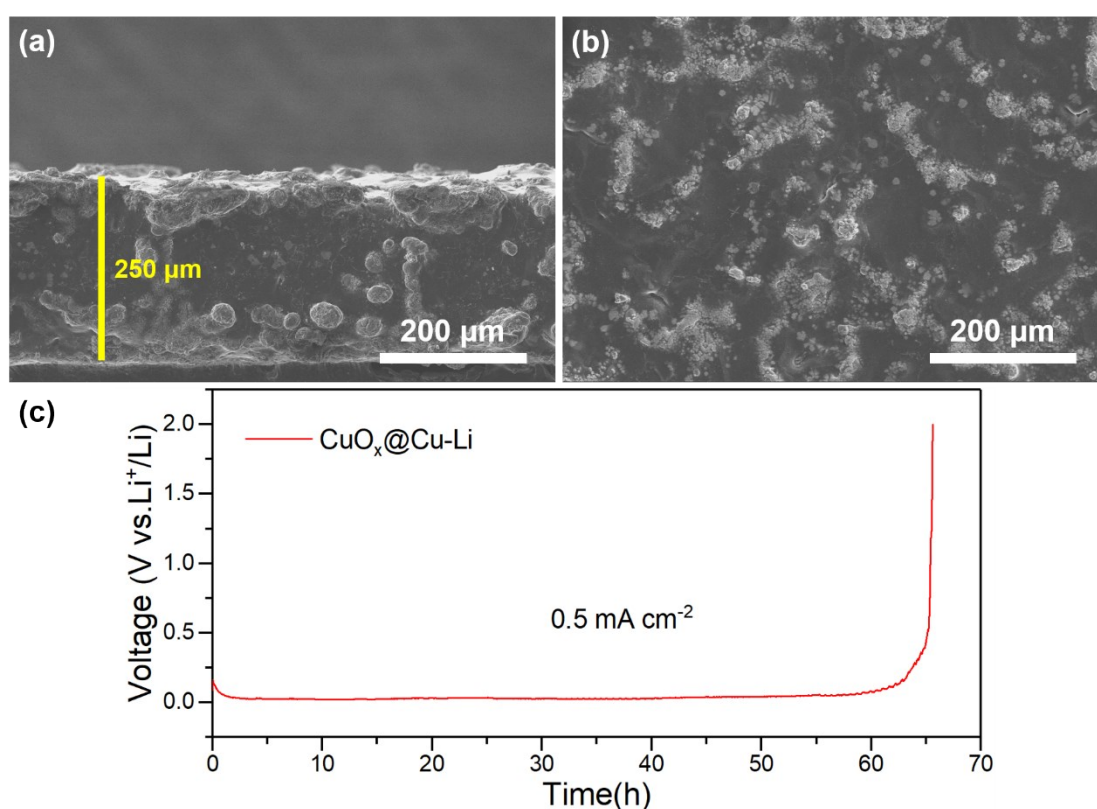

**Fig. S7.** (a) The cross-section image and (b) surface image of composite electrode with  $\text{CuO}_x@\text{Cu}$  and Li metal prepared by the molten Li infusion method. (c) The galvanostatic charging curve of the composite electrode at a current density of 0.5 mA cm<sup>-2</sup>. The maximum capacity is calculated as 65 h × 0.5 mA cm<sup>-2</sup> = 32.5 mAh cm<sup>-2</sup>, and the thickness is about 250 μm, so the volumetric capacity is 32.5 ÷ 0.025 = 1300 mAh cm<sup>-3</sup>.

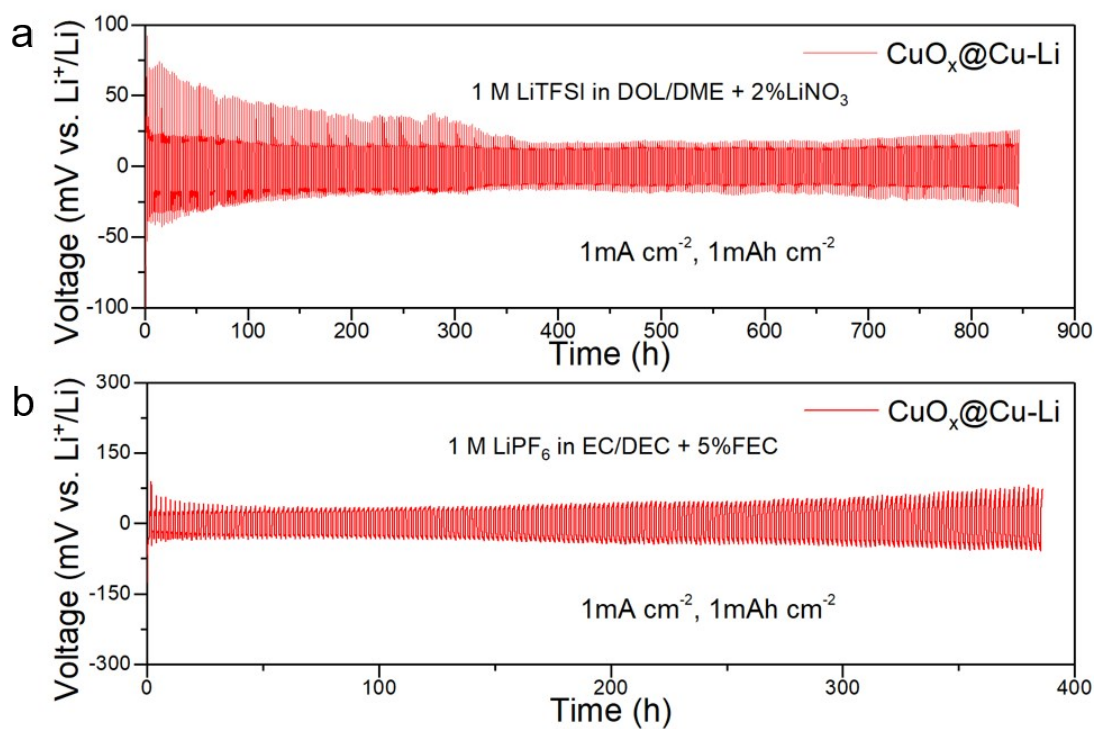

**Fig. S8.** The cycling performance of the  $\text{CuO}_x@Cu-Li$  (prepared by a molten Li infusion method) symmetric cell under the condition of  $1 \text{ mA cm}^{-2}$  and  $1 \text{ mAh cm}^{-2}$  in (a) the ether-based electrolyte and (b) the carbonate-based electrolyte.

**Table S1.** The fitted parameters for **Fig. 6d** and **e**, and the area is 0.785 cm<sup>2</sup>.

|                      | 1 <sup>st</sup>                        |                                        |                                         | 40 <sup>th</sup>                       |                                        |                                         |
|----------------------|----------------------------------------|----------------------------------------|-----------------------------------------|----------------------------------------|----------------------------------------|-----------------------------------------|
|                      | R <sub>Ω</sub> (Ω<br>cm <sup>2</sup> ) | R <sub>i</sub> (Ω<br>cm <sup>2</sup> ) | R <sub>ct</sub> (Ω<br>cm <sup>2</sup> ) | R <sub>Ω</sub> (Ω<br>cm <sup>2</sup> ) | R <sub>i</sub> (Ω<br>cm <sup>2</sup> ) | R <sub>ct</sub> (Ω<br>cm <sup>2</sup> ) |
| CuO <sub>x</sub> @Cu | 1.5                                    | 19.6                                   | 14.3                                    | 2.0                                    | 2.7                                    | 12.9                                    |
| P-Cu                 | 1.9                                    | 39.6                                   | 20.6                                    | 4.3                                    | 2.8                                    | 16.0                                    |
| Cu foil              | 1.2                                    | 48.5                                   | 27.1                                    | 2.4                                    | 29.8                                   | 26.6                                    |

**Table S2.** The performance comparison of CuO<sub>x</sub>@Cu with other reported lithiophilic scaffolds in half cells.

| Materials                                           | Current density<br>[mA cm <sup>-2</sup> ] | Capacity<br>[mA h cm <sup>-2</sup> ] | Cycle<br>number | Coulombic<br>efficiency [%] |
|-----------------------------------------------------|-------------------------------------------|--------------------------------------|-----------------|-----------------------------|
| Ni-Cu-CuO hybrid<br>structure <sup>2</sup>          | 1                                         | 1                                    | 250             | > 95                        |
|                                                     | 3                                         | 1                                    | 100             | > 90                        |
| Al layer<br>coated 3D Cu <sup>3</sup>               | 0.5                                       | 2                                    | 85              | ~ 98.6                      |
| Cu <sub>99</sub> Zn alloy<br>coated Cu <sup>4</sup> | 0.2                                       | 0.4                                  | 400             | 99                          |
|                                                     | 0.5                                       | 1                                    | 200             | > 97                        |
| Lithiated ZnO<br>on Cu foil <sup>5</sup>            | 1                                         | 1                                    | 200             | 99.2                        |
|                                                     | 3                                         | 1                                    | 200             | 93.3                        |
| CuON nanoarray on<br>Cu foam <sup>6</sup>           | 2                                         | 1                                    | 100             | > 98                        |
| ZnO modified<br>Ni foam <sup>7</sup>                | 1                                         | 1                                    | 300             | > 98                        |
| Graphene coated<br>Cu foam <sup>8</sup>             | 2                                         | 1                                    | 150             | 97.4                        |
| CuO nanosheets<br>on Cu foil <sup>9</sup>           | 1                                         | 1                                    | 180             | 94                          |

|                                               |          |          |                |             |
|-----------------------------------------------|----------|----------|----------------|-------------|
| N-doped graphene-coated Ni foam <sup>10</sup> | 1        | 1        | 200            | 98          |
|                                               | <b>1</b> | <b>1</b> | <b>&gt;520</b> | <b>98.8</b> |
| <b>This work</b>                              | <b>3</b> | <b>1</b> | <b>240</b>     | <b>98.4</b> |
|                                               | <b>5</b> | <b>1</b> | <b>170</b>     | <b>98.0</b> |
|                                               | <b>1</b> | <b>4</b> | <b>120</b>     | <b>99.1</b> |

## Reference

1. F. W. Young, J. V. Cathcart and A. T. Gwathmey, *Acta Metallurgica*, 1956, **4**, 145-152.
2. S. Wu, Z. Zhang, M. Lan, S. Yang, J. Cheng, J. Cai, J. Shen, Y. Zhu, K. Zhang and W. Zhang, *Adv. Mater.*, 2018, **30**.
3. H. Ye, Z. J. Zheng, H. R. Yao, S. C. Liu, T. T. Zuo, X. W. Wu, Y. X. Yin, N. W. Li, J. J. Gu, F. F. Cao and Y. G. Guo, *Angew. Chem. Int. Ed. Engl.*, 2019, **58**, 1094-1099.
4. S. Liu, X. Zhang, R. Li, L. Gao and J. Luo, *Energy Storage Mater.*, 2018, **14**, 143-148.
5. G. Wang, X. Xiong, P. Zou, X. Fu, Z. Lin, Y. Li, Y. Liu, C. Yang and M. Liu, *Chem. Eng. J.*, 2019, **378**.
6. M. Lei, Z. You, L. Ren, X. Liu and J.-G. Wang, *J. Power Sources*, 2020, **463**.
7. C. Sun, Y. Li, J. Jin, J. Yang and Z. Wen, *J. Mater. Chem. A*, 2019, **7**, 7752-7759.
8. G. Yang, J. Chen, P. Xiao, P. O. Agboola, I. Shakir and Y. Xu, *J. Mater. Chem. A*, 2018, **6**, 9899-9905.
9. C. Zhang, W. Lv, G. Zhou, Z. Huang, Y. Zhang, R. Lyu, H. Wu, Q. Yun, F. Kang and Q.-H. Yang, *Adv. Energy Mater.*, 2018, **8**.
10. R. Song, B. Wang, Y. Xie, T. Ruan, F. Wang, Y. Yuan, D. Wang and S. Dou, *J. Mater. Chem. A*, 2018, **6**, 17967-17976.
